# Supplementary material
Source: ML conference proceedings conference paper supplement (https://proceedings.neurips.cc/paper_files/paper/2015/hash/536a76f94cf7535158f66cfbd4b113b6-Abstract.html)
Supplement: Supplementary file [file 536a76f94cf7535158f66cfbd4b113b6-Supplemental.zip]

---

# Spectral Representations for Convolutional Neural Networks: Supplementary Material

---

## 1 Appendix A: Algorithmic Implementation Details

Here we provide additional detail pertaining to the specific algorithmic implementation of the spectral pooling and spectral parameterization. Algorithms 1 and 2 detail the steps required to compute the spectral pooling and corresponding back-propagation respectively. CROPSPECTRUM and PADSPECTRUM are self-explanatory: they crop or zero-pad the frequency spectrum to the appropriate dimensionalities, respectively.

---

### Algorithm 1: Spectral pooling

---

**Input:** Map  $\mathbf{x} \in \mathbb{R}^{M \times N}$ , output size  $H \times W$   
**Output:** Pooled map  $\hat{\mathbf{x}} \in \mathbb{R}^{H \times W}$

- 1:  $\mathbf{y} \leftarrow \mathcal{F}(\mathbf{x})$
- 2:  $\hat{\mathbf{y}} \leftarrow \text{CROPSPECTRUM}(\mathbf{y}, H \times W)$
- 3:  $\hat{\mathbf{y}} \leftarrow \text{TREATCORNERCASES}(\hat{\mathbf{y}})$
- 4:  $\hat{\mathbf{x}} \leftarrow \mathcal{F}^{-1}(\hat{\mathbf{y}})$

---



---

### Algorithm 2: Spectral pooling back-propagation

---

**Input:** Gradient w.r.t output  $\frac{\partial R}{\partial \hat{\mathbf{x}}}$   
**Output:** Gradient w.r.t input  $\frac{\partial R}{\partial \mathbf{x}}$

- 1:  $\hat{\mathbf{z}} \leftarrow \mathcal{F}\left(\frac{\partial R}{\partial \hat{\mathbf{x}}}\right)$
- 2:  $\hat{\mathbf{z}} \leftarrow \text{REMOVEREDUNDANCY}(\hat{\mathbf{z}})$
- 3:  $\mathbf{z} \leftarrow \text{PADSPECTRUM}(\hat{\mathbf{z}}, M \times N)$
- 4:  $\mathbf{z} \leftarrow \text{RECOVERMAP}(\mathbf{z})$
- 5:  $\frac{\partial R}{\partial \mathbf{x}} \leftarrow \mathcal{F}^{-1}(\mathbf{z})$

---



---

### Algorithm 3: TREATCORNERCASES

---

**Input:** Input map  $\mathbf{y} \in \mathbb{C}^{M \times N}$   
**Output:** Output map  $\mathbf{z}$  with corner cases obeying conjugate symmetry, special case indices  $S$

- 1:  $\mathbf{z} \leftarrow \mathbf{y}$
- 2:  $S \leftarrow \{(0, 0)\}$
- 3: **if**  $M$  is even **then**
- 4:    $S \leftarrow \{(\frac{M}{2}, 0)\}$
- 5: **end if**
- 6: **if**  $N$  is even **then**
- 7:    $S \leftarrow \{(0, \frac{N}{2})\}$
- 8: **end if**
- 9: **if**  $M$  is even and  $N$  is even **then**
- 10:    $S \leftarrow \{(\frac{M}{2}, \frac{N}{2})\}$
- 11: **end if**
- 12: **for**  $i \in S$  **do**
- 13:    $\text{Im}(z_i) \leftarrow 0$
- 14: **end for**

---

---

Algorithm 4: REMOVEREDUNDANCY

---

**Input:** Input gradient map  $\mathbf{y} \in \mathbb{C}^{M \times N}$

**Output:** Gradient  $\mathbf{z}$  in terms of unconstrained parameters only

```

1:  $\mathbf{z}, S \leftarrow \text{TREATCORNERCASES}(\mathbf{y})$ 
2:  $I \leftarrow \emptyset$ 
3: for  $m = 0, \dots, M - 1$  do
4:   for  $n = 0, \dots, \lfloor \frac{N}{2} \rfloor$  do
5:     if  $(m, n) \notin S$  then
6:       if  $(m, n) \notin I$  then
7:          $z_{m,n} \leftarrow 2z_{m,n}$ 
8:          $I \leftarrow I \cup \{(m, n), ((M - m) \bmod M, (N - n) \bmod N)\}$ 
9:       else
10:         $z_{m,n} \leftarrow 0$ 
11:      end if
12:    end if
13:  end for
14: end for

```

---



---

Algorithm 5: RECOVERMAP

---

**Input:** Input gradient  $\mathbf{y} \in \mathbb{C}^{M \times N}$  parametrized by unconstrained elements only

**Output:** Full gradient  $\mathbf{z}$  with recovered redundancy

```

1:  $\mathbf{z}, S \leftarrow \text{TREATCORNERCASES}(\mathbf{y})$ 
2:  $I \leftarrow \emptyset$ 
3: for  $m = 0, \dots, M - 1$  do
4:   for  $n = 0, \dots, \lfloor \frac{N}{2} \rfloor$  do
5:     if  $(m, n) \notin S$  then
6:       if  $(m, n) \notin I$  then
7:          $z_{m,n} \leftarrow \frac{1}{2}z_{m,n}$ 
8:          $z_{(M-m) \bmod M, (N-n) \bmod N} \leftarrow z_{m,n}$ 
9:          $I \leftarrow I \cup \{(m, n), ((M - m) \bmod M, (N - n) \bmod N)\}$ 
10:      else
11:         $z_{m,n} \leftarrow 0$ 
12:      end if
13:    end if
14:  end for
15: end for

```

---
